# Supplementary material
Source: PubMed Central journal article supplement (PMC3093129)

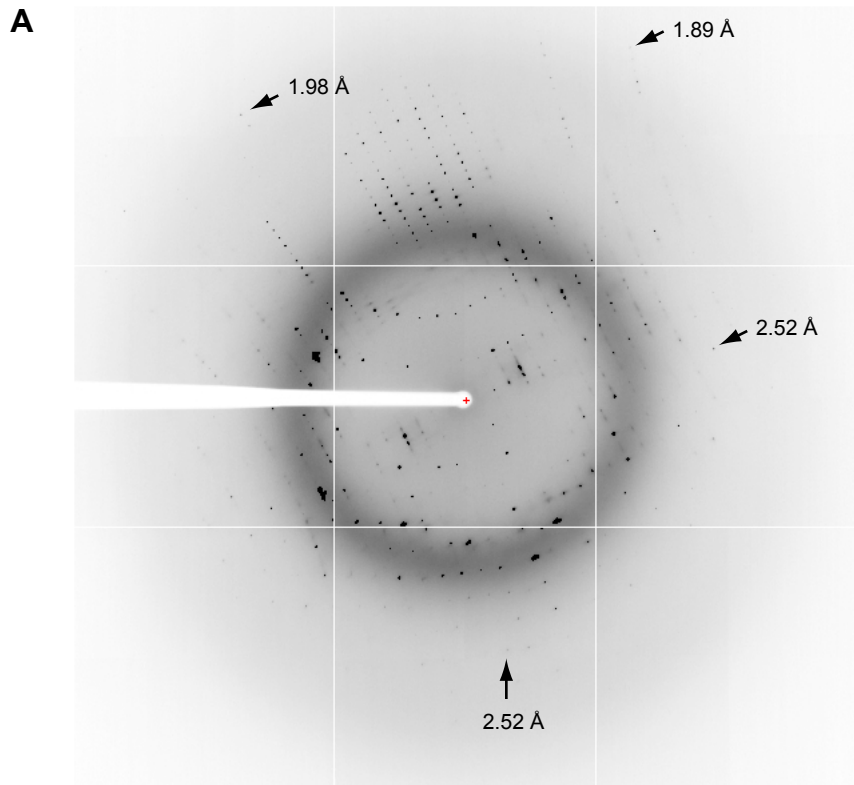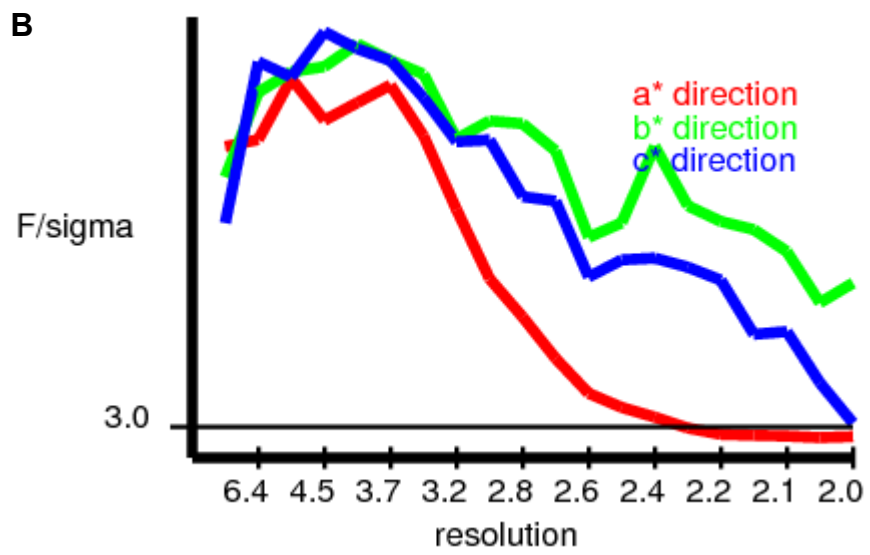

Supplement: NIHMS289730-supplement-2_si_002.pdf [file NIHMS289730-supplement-2_si_002.pdf]

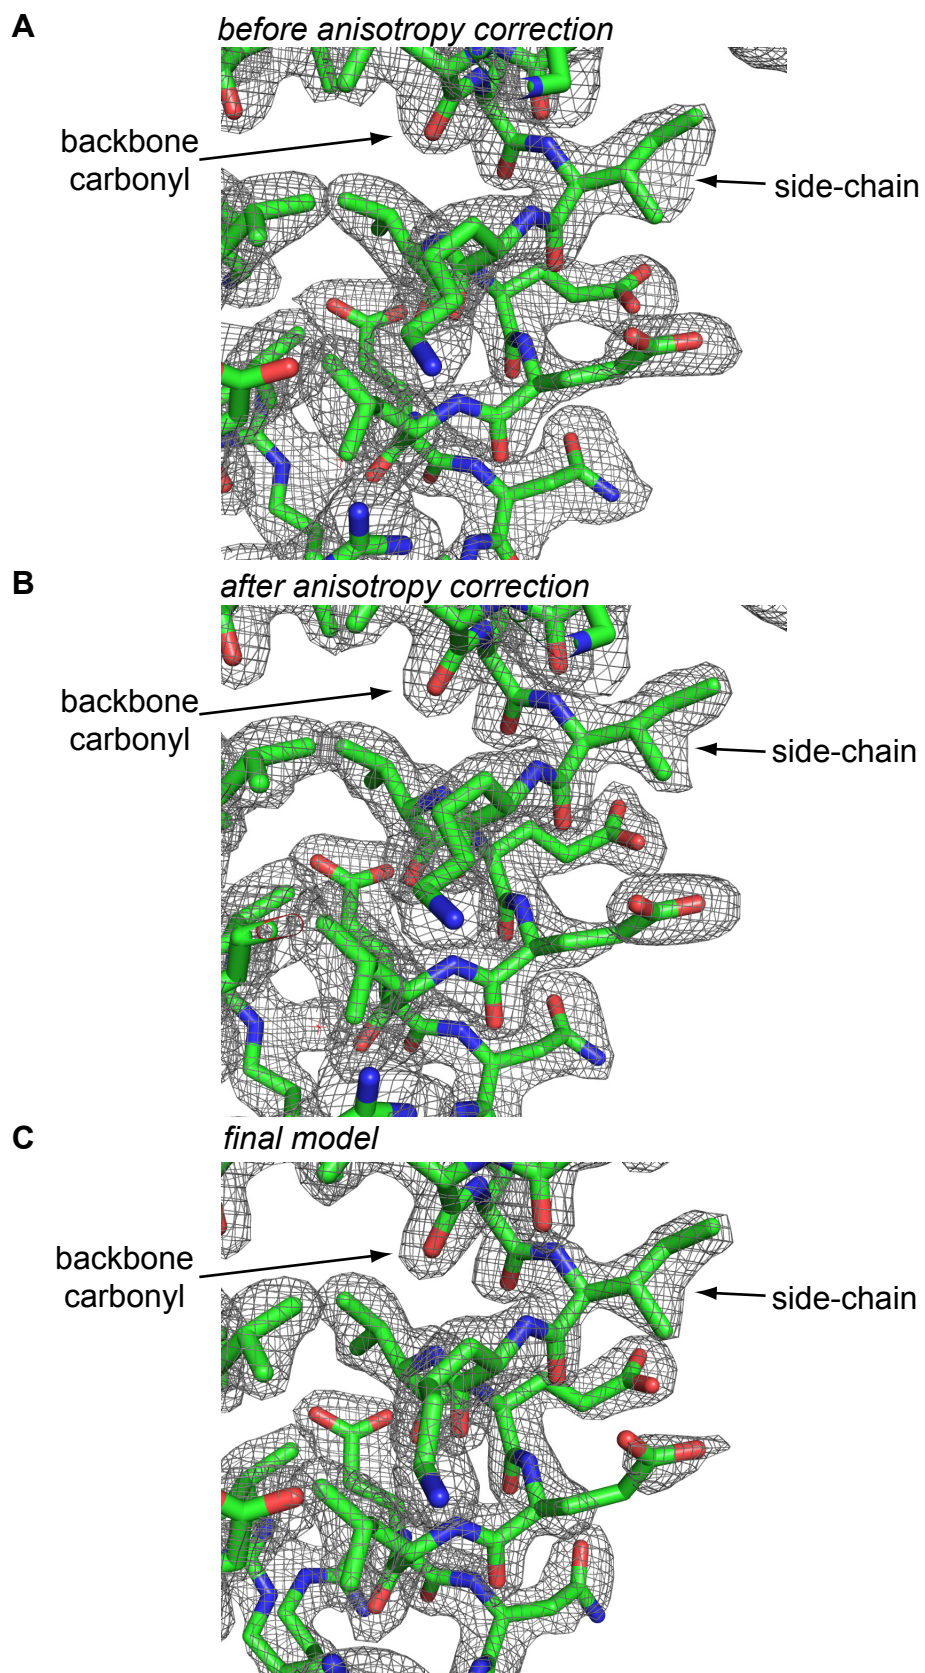

Supplement: NIHMS289730-supplement-3_si_003.pdf [file NIHMS289730-supplement-3_si_003.pdf]
